# Supplementary material
Source: PubMed Central journal article supplement (PMC10845039)
Supplement: jama-e240919-s002.pdf [file jama-e240919-s002.pdf]

## Data Sharing Statement

Alhiary. Delivery Device Patents on GLP-1 Receptor Agonists. *JAMA*. Published February 05, 2024. doi:10.1001/jama.2024.0919

### Data

**Data available:** Yes

**Data types:** Data (not involving human participants)

**How to access data:** [wbfeldman@bwh.harvard.edu](mailto:wbfeldman@bwh.harvard.edu)

**When available:** With publication

### Supporting Documents

**Document types:** None

### Additional Information

**Who can access the data:** Researchers whose proposed use of the data has been approved.

**Types of analyses:** For research purposes.

**Mechanisms of data availability:** After approval of a proposal.

**Any additional restrictions:** None.
